# Supplementary material for: High Curie temperature ferromagnetic monolayer T-CrSH and valley physics of T-CrSH/WS2 heterostructure
Source: Royal Society of Chemistry journal article supplement (doi:10.1039/d3cp05543d), 2024-01-01
Supplement: d3cp05543d1.pdf [file d3cp05543d1.pdf]

## High Curie temperature ferromagnetic monolayer T-CrSH and valley physics of T-CrSH/WS<sub>2</sub> heterostructure

Xiaole Qiu, Bing Liu, Lin Ge, Lianzhen Cao, Kai Han and Hongchao Yang\*

School of Physics and Electronic Information, Weifang University, Weifang 261061, China

\*Corresponding author: hc\_yang90@163.com

**Table S1** Relative energies (meV/Cr) of Stripe AFM, Dimer AFM, Zigzag AFM, and Non-collinear AFM states for the monolayer Janus T-CrSH with respect to that of the FM state at different strains. The energy differences between FM and AFM states can be calculated by  $\Delta E = E_{AFM} - E_{FM}$ , where  $E_{AFM}$  corresponds to the AFM state with the lowest energy, that is, in the range of -3%-5% strains  $E_{AFM}$  represents the energy of Dimer AFM state, while at the -4% and -5% strains  $E_{AFM}$  represents the energy of Zigzag AFM state.

| Strain | FM    | Stripe AFM | Dimer AFM | Zigzag AFM | Non-collinear AFM | $\Delta E$ |
|--------|-------|------------|-----------|------------|-------------------|------------|
|        | (meV) |            |           |            |                   |            |
| -5 %   | 0.00  | -17.40     | -16.94    | -36.61     | -30.39            | -36.61     |
| -4 %   | 0.00  | 4.12       | -4.19     | -12.96     | -4.765            | -12.96     |
| -3 %   | 0.00  | 23.49      | 7.22      | 8.315      | 18.41             | 7.22       |
| -2 %   | 0.00  | 40.85      | 17.35     | 27.41      | 39.35             | 17.35      |
| -1 %   | 0.00  | 56.25      | 26.31     | 44.38      | 58.01             | 26.31      |
| 0 %    | 0.00  | 53.01      | 27.81     | 43.50      | 56.33             | 27.81      |
| 1 %    | 0.00  | 81.58      | 40.91     | 72.43      | 89.01             | 40.91      |
| 2 %    | 0.00  | 91.71      | 46.74     | 83.66      | 101.62            | 46.74      |
| 3 %    | 0.00  | 100.32     | 51.70     | 93.28      | 112.46            | 51.70      |
| 4 %    | 0.00  | 107.43     | 55.75     | 101.27     | 121.61            | 55.750     |

|     |      |        |       |        |        |       |
|-----|------|--------|-------|--------|--------|-------|
| 5 % | 0.00 | 113.13 | 58.98 | 107.58 | 129.19 | 58.98 |
|-----|------|--------|-------|--------|--------|-------|

**Table S2** Relative energies (meV) of the T-CrSH/WS<sub>2</sub> heterostructures (a), (b), (d), (e) and (f) with respect to that of the configuration (c).

| configuration | a     | b      | c | d     | e      | f     |
|---------------|-------|--------|---|-------|--------|-------|
| $\Delta E$    | 16.67 | 114.78 | 0 | 91.29 | 143.24 | 93.37 |

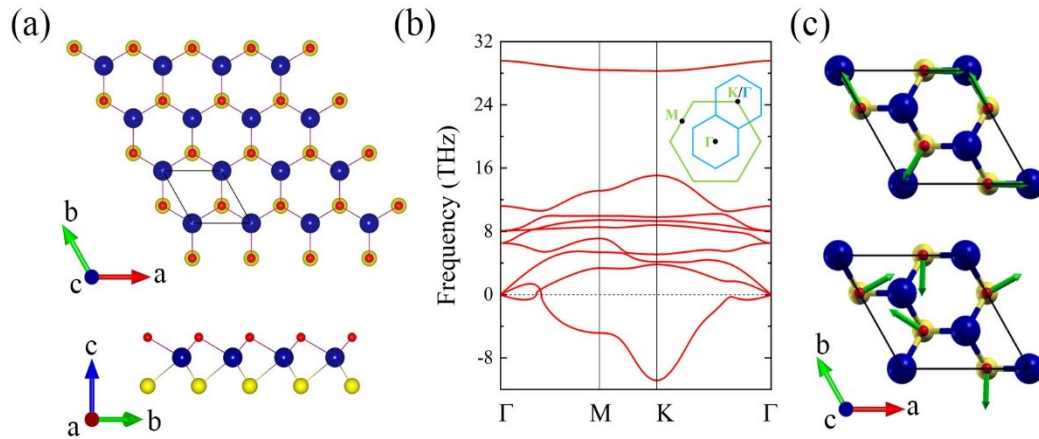

**Fig. S1** (a) Top and side view of monolayer Janus H-CrSH. The unit cell is outlined by the black solid line in the top view. The blue, red, and yellow balls represent Cr, H and S atoms, respectively. (b) Phonon spectrum of the monolayer Janus CrSH along the high-symmetry paths of the BZ. Inset shows the BZs of the unit cell (green) and the  $\sqrt{3} \times \sqrt{3}$  supercell (blue), where the K point of the former coincides with the  $\Gamma$  point of the latter. (c) Displacement patterns of two doubly degenerated imaginary phonon modes at the K point of the unit cell BZ.

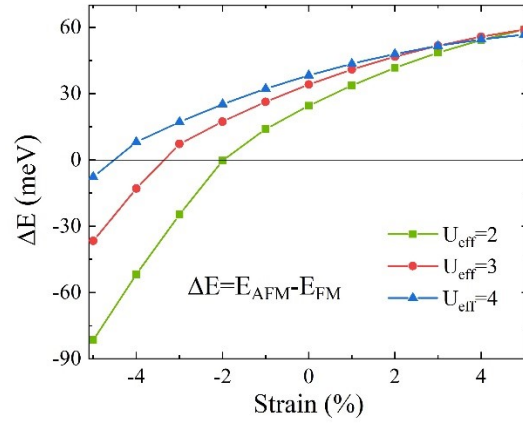

**Fig. S2.** Variation of the energy difference between AFM and FM states as a function of the biaxial strain of Janus T-CrSH.

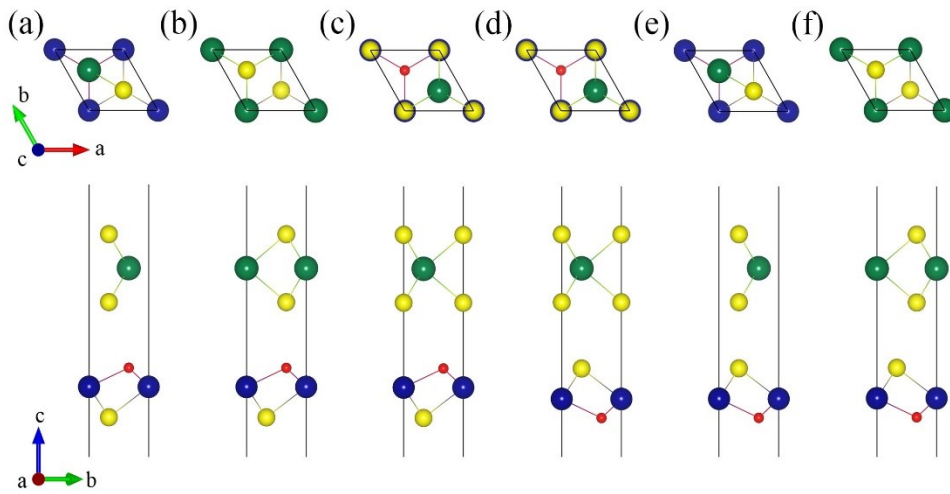

**Fig. S3** (a) to (f) are top and side views of six T-CrSH/WS<sub>2</sub> heterostructures. The blue, red, yellow and green balls represent Cr, H, S and W atoms, respectively.

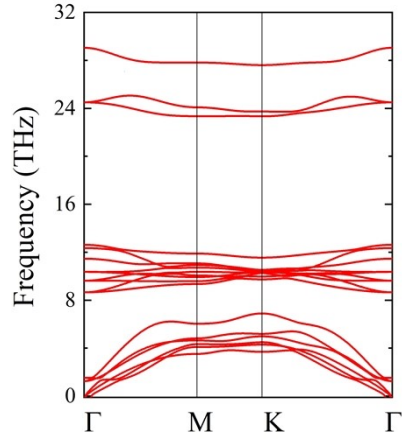

**Fig. S4** Phonon spectrum of the T-CrSH/WS<sub>2</sub> heterostructure along the high-symmetry paths of the BZ.

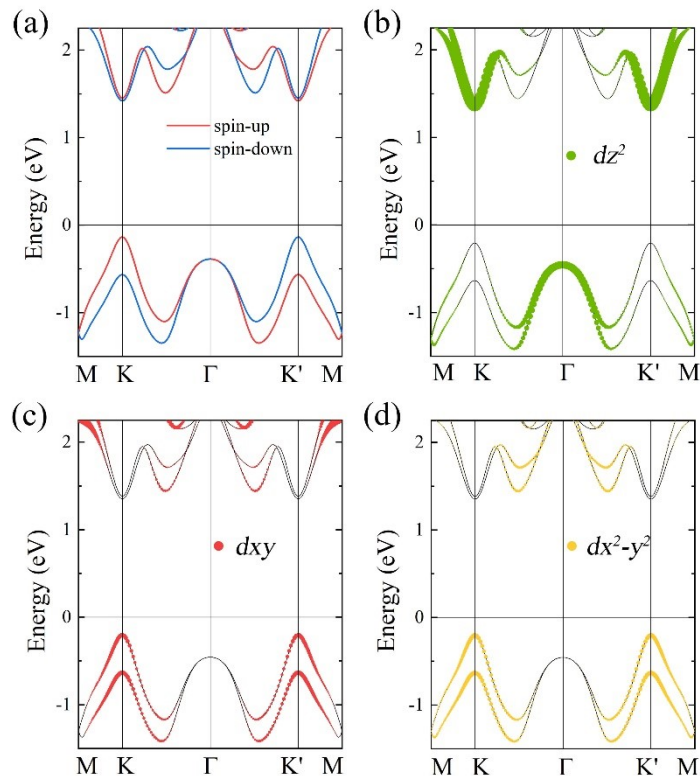

**Fig. S5** (a) Spin-polarized and (b)-(d) the W-*d*-resolved band structures of monolayer WS<sub>2</sub> with SOC effect.

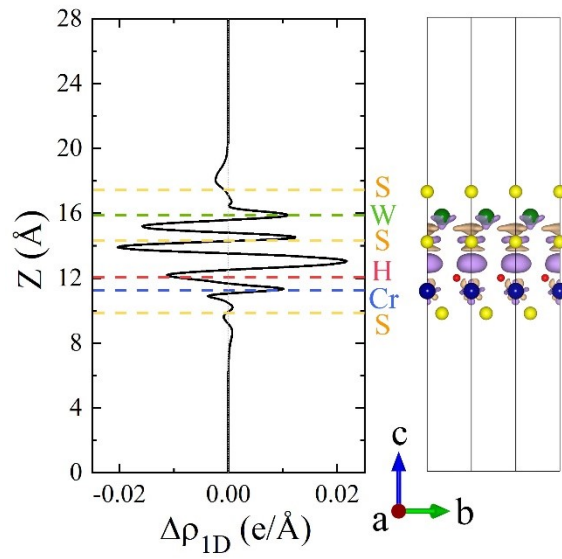

**Fig. S6** Left and right panels represent one and three-dimensional charge difference densities for the T-CrSH/WS<sub>2</sub> heterostructure, respectively. In the left panel, the atomic positions are marked by the dotted lines. In the right panel, the value of the isosurface is set to  $0.0004 e\text{\AA}^{-3}$ , and the purple (orange) distribution corresponds to charge accumulation (depletion).
